# Supplementary material for: Aggregation induced emission characteristics of maleimide derivatives
Source: Royal Society of Chemistry journal article supplement (doi:10.1039/c3ra42809e), 2013-01-01
Supplement: c3ra42809e.pdf [file c3ra42809e.pdf]

## SUPPORTING INFORMATION

### Aggregation Induced Emission characteristics of maleimide derivative

Muthusamy Boominathan,<sup>a</sup> Veerasamy Sathish,<sup>a</sup> Muthupandi Nagaraj,<sup>a</sup>

Shanmugam Muthusubramanian,<sup>a\*</sup> Seenivasan Rajagopal,<sup>a\*†</sup> and Nattamai Bhuvanesh<sup>b</sup>

<sup>a</sup> School of Chemistry, Madurai Kamaraj University, Madurai 625 021, India

<sup>b</sup> X-ray Diffraction Laboratory, Department of Chemistry, Texas A&M University,  
College Station, TX 77842

[muthumanian2001@yahoo.com](mailto:muthumanian2001@yahoo.com)

#### Table of Contents

|                                                                                  | Page(s) |
|----------------------------------------------------------------------------------|---------|
| 1. Characterization data for <b>3a - 3e</b> .....                                | S2      |
| 2. <sup>1</sup> H, <sup>13</sup> C NMR and 2D NMR spectrum of <b>3a-3e</b> ..... | S3-S16  |
| 3. IR spectrum of <b>3a-3e</b> .....                                             | S17-21  |
| 4. Selected Crystallographic Data for <b>3a</b> .....                            | S22     |

*1-Phenyl-3-(phenylamino)-1H-pyrrole-2,5-dione (3a)* Isolated yield 0.26 g (97%); Yellow solid; mp 229-231 °C, (230-232 °C lit)<sup>33</sup>; <sup>1</sup>H NMR (300 MHz, DMSO-*d*<sub>6</sub>) δ 5.82 (s, 1H), 7.12 (m, 1H), 7.36-7.50 (m, 9H), 9.86 (s, 1H); <sup>13</sup>C NMR (75 MHz, DMSO-*d*<sub>6</sub>) δ 89.3, 120.7, 124.8, 127.5, 128.3, 129.7, 130.2, 132.9, 140.2, 144.7, 167.4, 172.1.

*1-(4-Methoxyphenyl)-3-(4-methoxyphenylamino)-1H-pyrrole-2,5-dione (3b)* Isolated yield 0.32 g (98%); Yellow solid; mp 221-223 °C (221-223 °C lit)<sup>33</sup>; <sup>1</sup>H NMR (300 MHz, DMSO-*d*<sub>6</sub>) δ 2.51 (s, 3H), 2.54 (s, 3H), 4.36 (s, 1H), 5.73- 6.15 (m, 8H), 8.52 (s, 1H); <sup>13</sup>C NMR (75 MHz, DMSO-*d*<sub>6</sub>) δ 56.2, 56.3, 87.3, 115.0, 115.4, 122.3, 125.5, 129.0, 133.2, 145.1, 156.8, 159.2, 167.6, 172.3.

*1-(4-Chlorophenyl)-3-(4-chlorophenylamino)-1H-pyrrole-2,5-dione (3c)* Isolated yield 0.32 g (95%); Yellow solid; mp 247-249 °C, (249-251 °C lit)<sup>33</sup>; <sup>1</sup>H NMR (300 MHz, DMSO-*d*<sub>6</sub>) δ 5.86 (s, 1H), 7.31-7.55 (m, 8H), 9.99 (s, 1H); <sup>13</sup>C NMR (75 MHz, DMSO-*d*<sub>6</sub>) δ 89.8, 121.9, 128.2, 128.5, 129.2, 129.6, 131.3, 132.2, 138.7, 144.1, 166.6, 171.1.

*1-(4-Bromophenyl)-3-(4-bromophenylamino)-1H-pyrrole-2,5-dione (3d)* Isolated yield 0.41 g (97%); Yellow solid; mp 259-261 °C, (260-262 °C lit)<sup>33</sup>; <sup>1</sup>H NMR (300 MHz, DMSO-*d*<sub>6</sub>) δ 5.92 (s, 1H), 7.30-7.83 (m, 8H), 9.97 (s, 1H); <sup>13</sup>C NMR (75 MHz, DMSO-*d*<sub>6</sub>) δ 90.5, 118.5, 122.8, 125.7, 126.8, 130.9, 131.5, 133.7, 141.3, 143.7, 167.5, 170.7.

*1-(4-Fluorophenyl)-3-(4-fluorophenylamino)-1H-pyrrole-2,5-dione (3e)* Isolated yield 0.30 g (98%); Yellow solid; mp 274-276 °C, (274-276 °C lit)<sup>33</sup>; <sup>1</sup>H NMR (300 MHz, DMSO-*d*<sub>6</sub>) δ 5.80 (s, 1H), 7.24-7.52 (m, 8H), 9.95 (s, 1H); <sup>13</sup>C NMR (75 MHz, DMSO-*d*<sub>6</sub>) δ 88.4, 116.2, 122.2, 129.0, 136.1, 144.5, 157.4, 159.7, 160.6, 162.9, 166.8, 171.3.

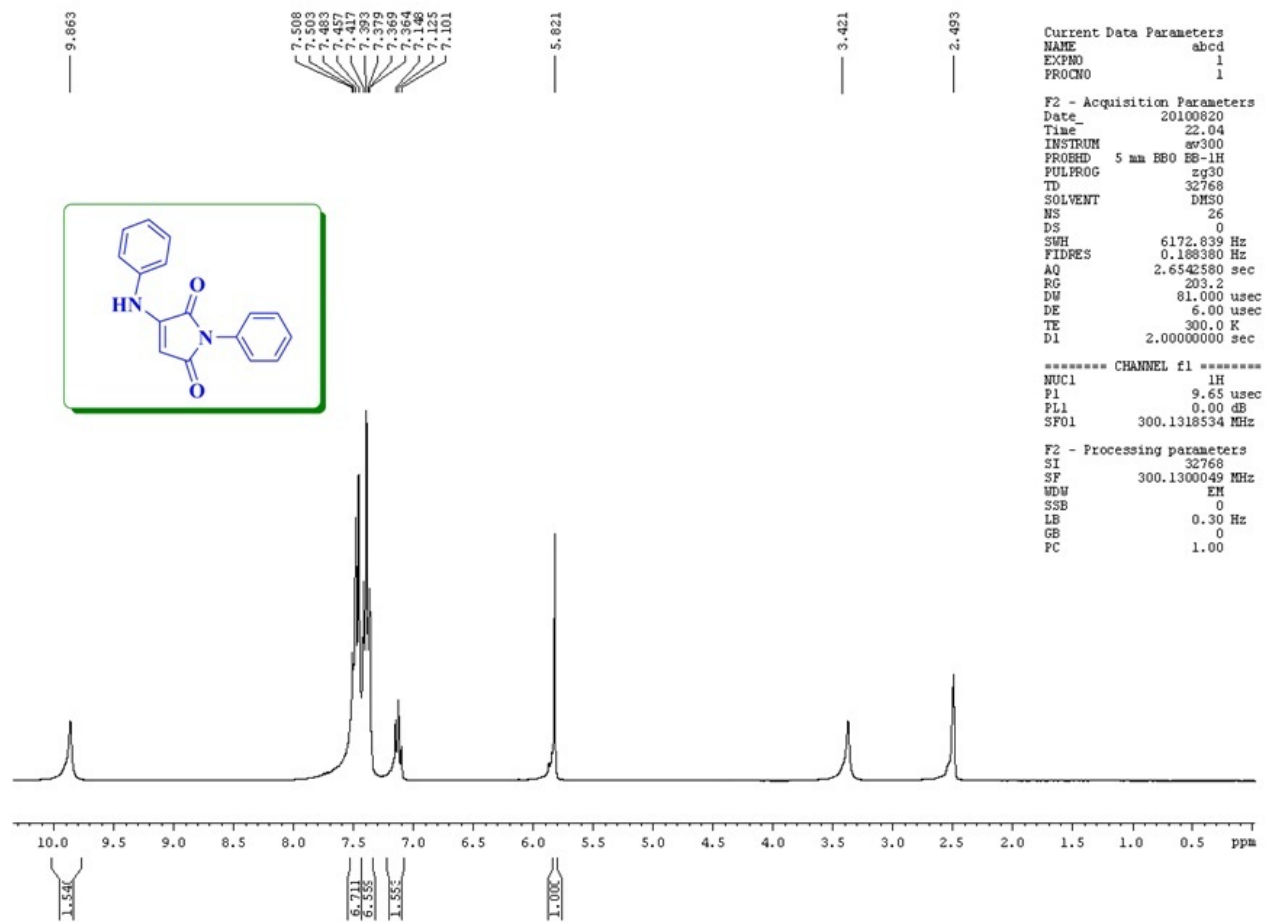

FIG 1: <sup>1</sup>H NMR spectrum of **3a**

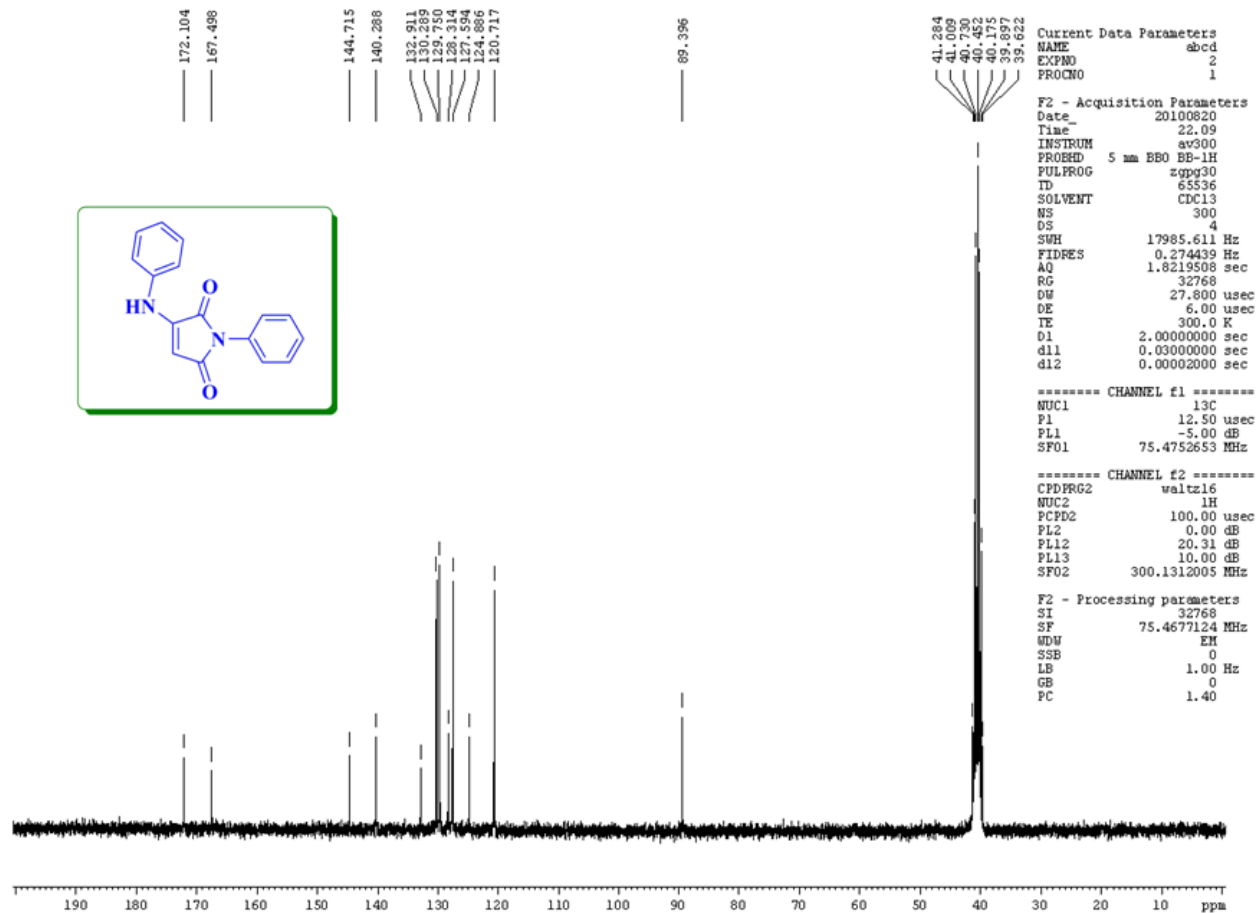

FIG 2:  $^{13}\text{C}$  NMR spectrum of **3a**

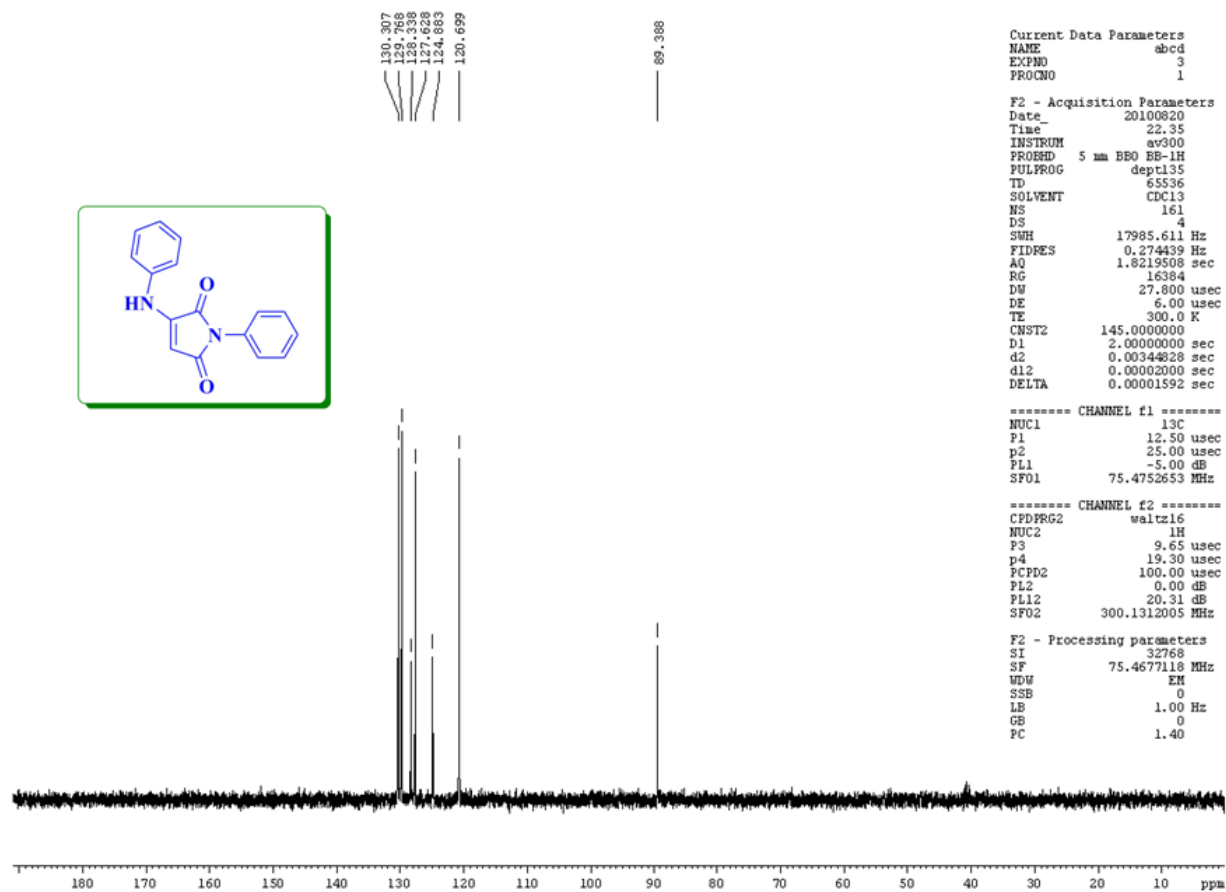

Fig. 3 DEPT Spectrum of 3a

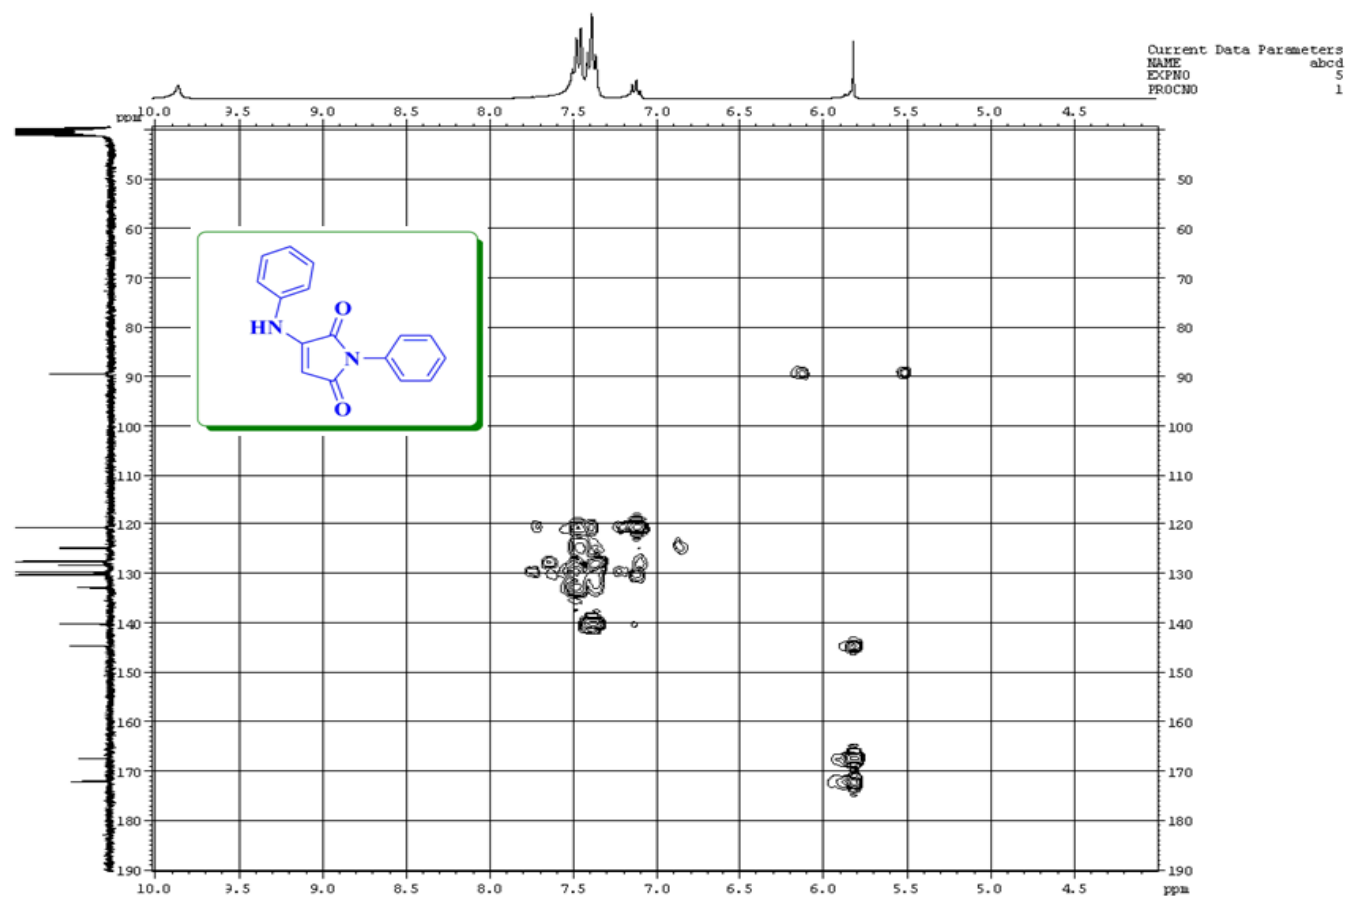

Fig. 4 HMBC Spectrum of **3a**

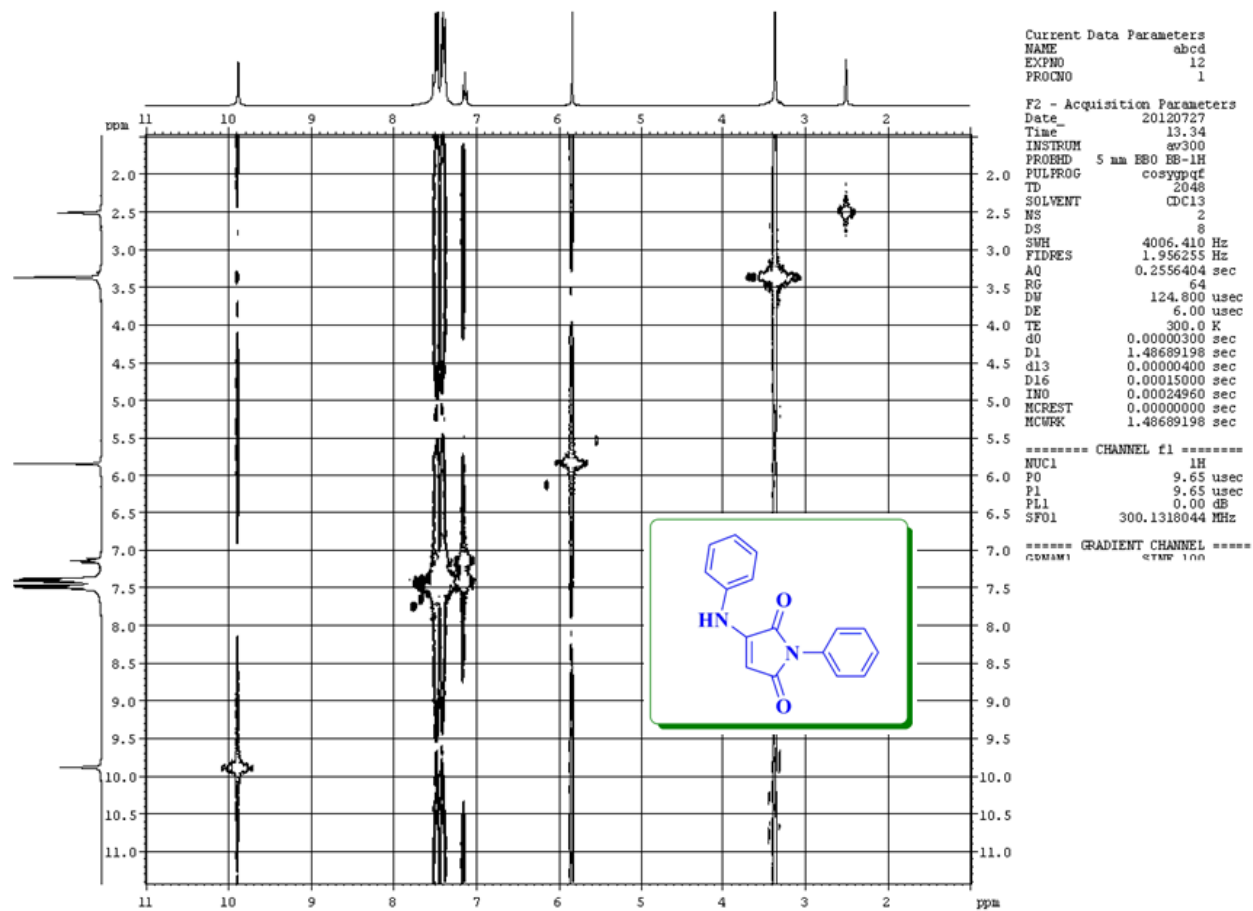

FIG 5: H-H COSY spectrum of **3a**

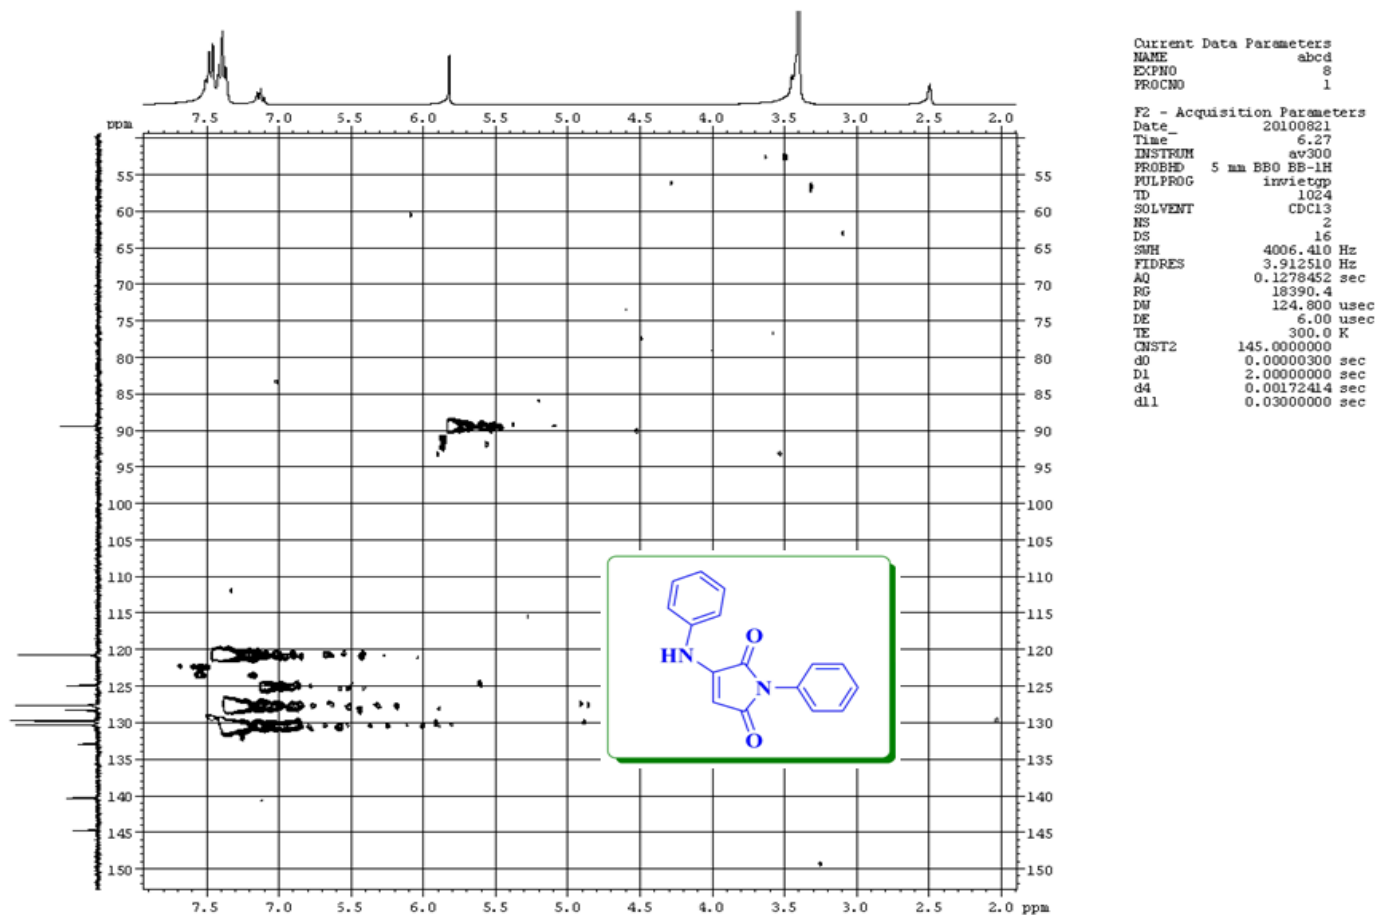

FIG 6: CH- COSY Spectrum of **3a**



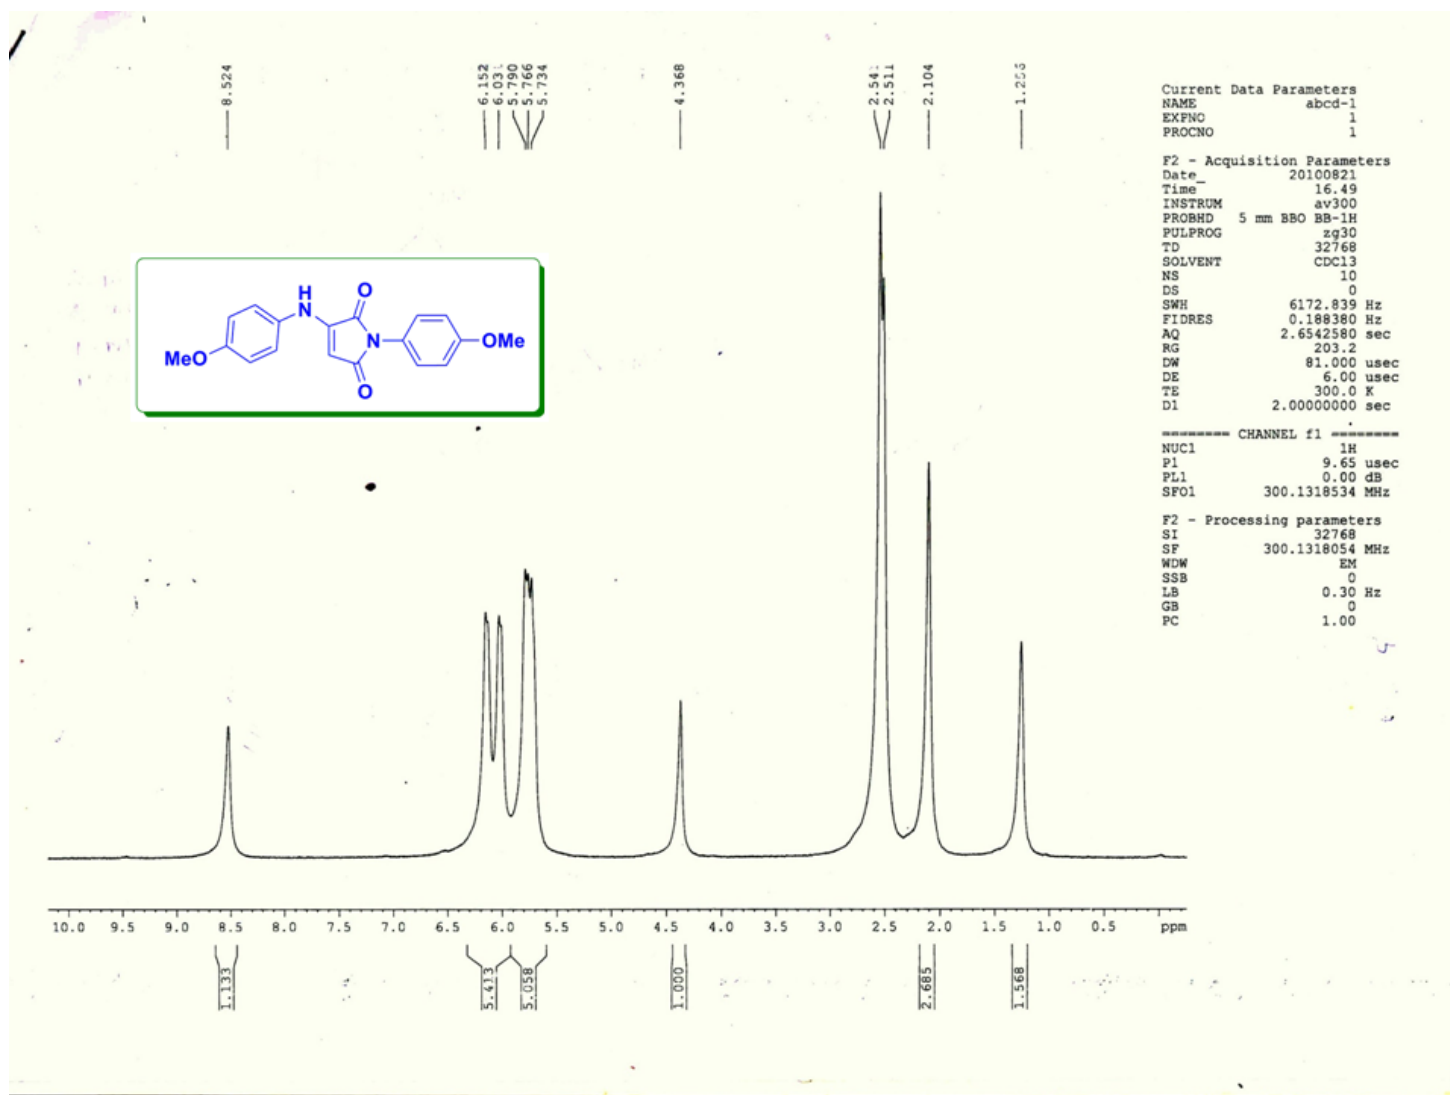

FIG 7:  $^1\text{H}$  NMR spectrum of **3b**

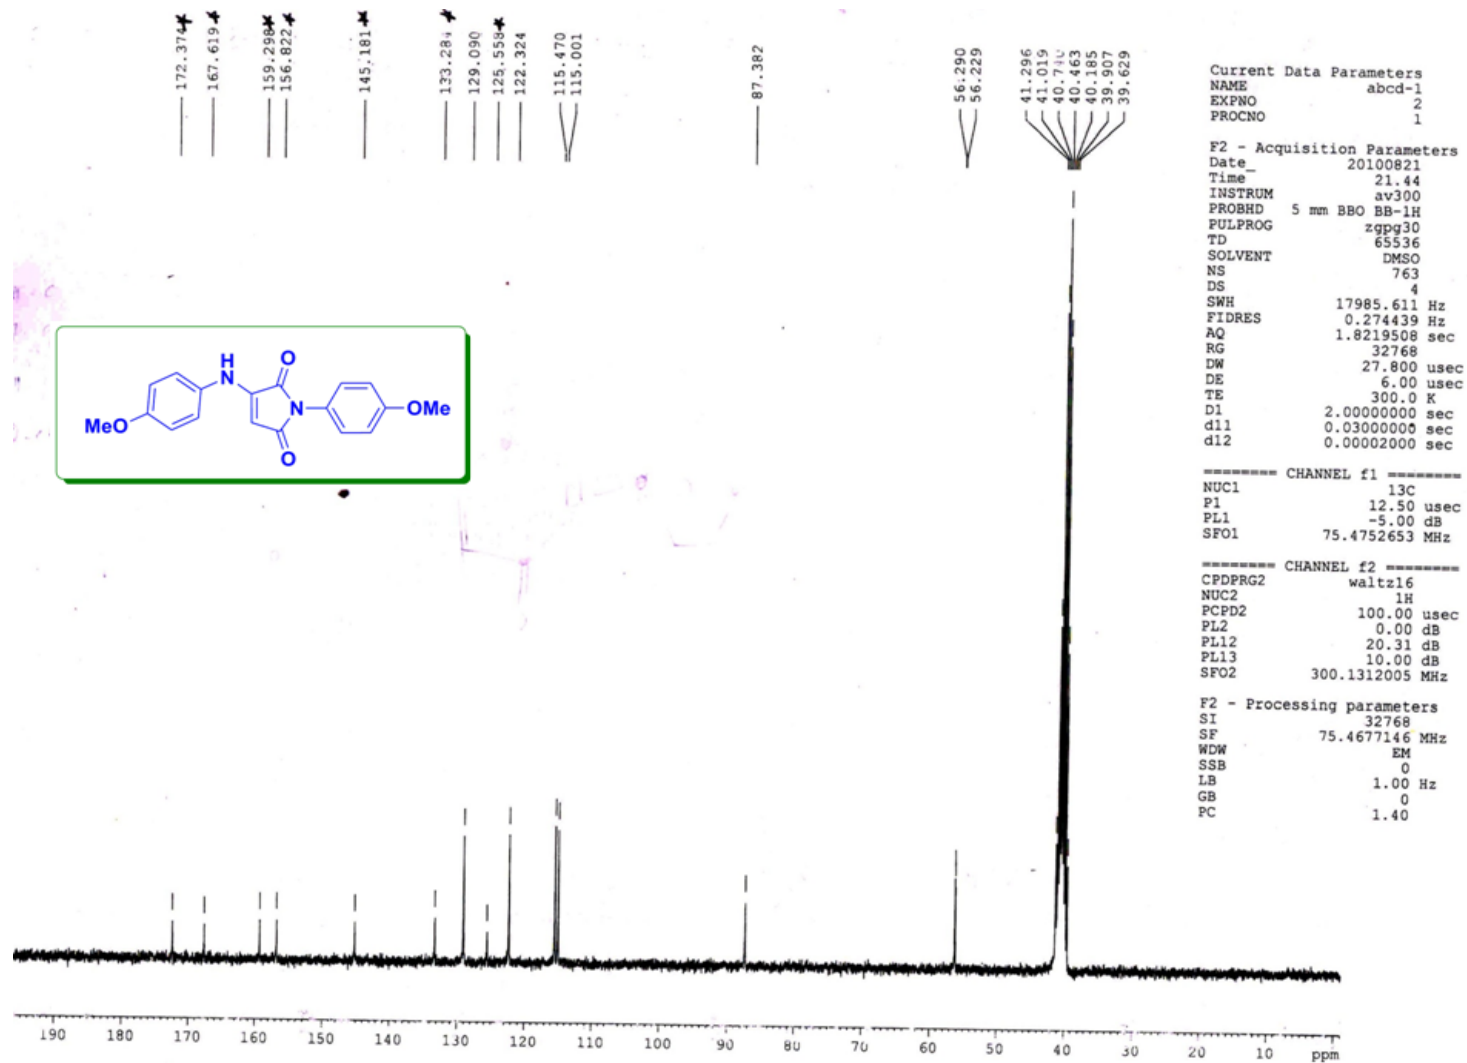

FIG 8:  $^{13}\text{C}$  NMR spectrum of 3b

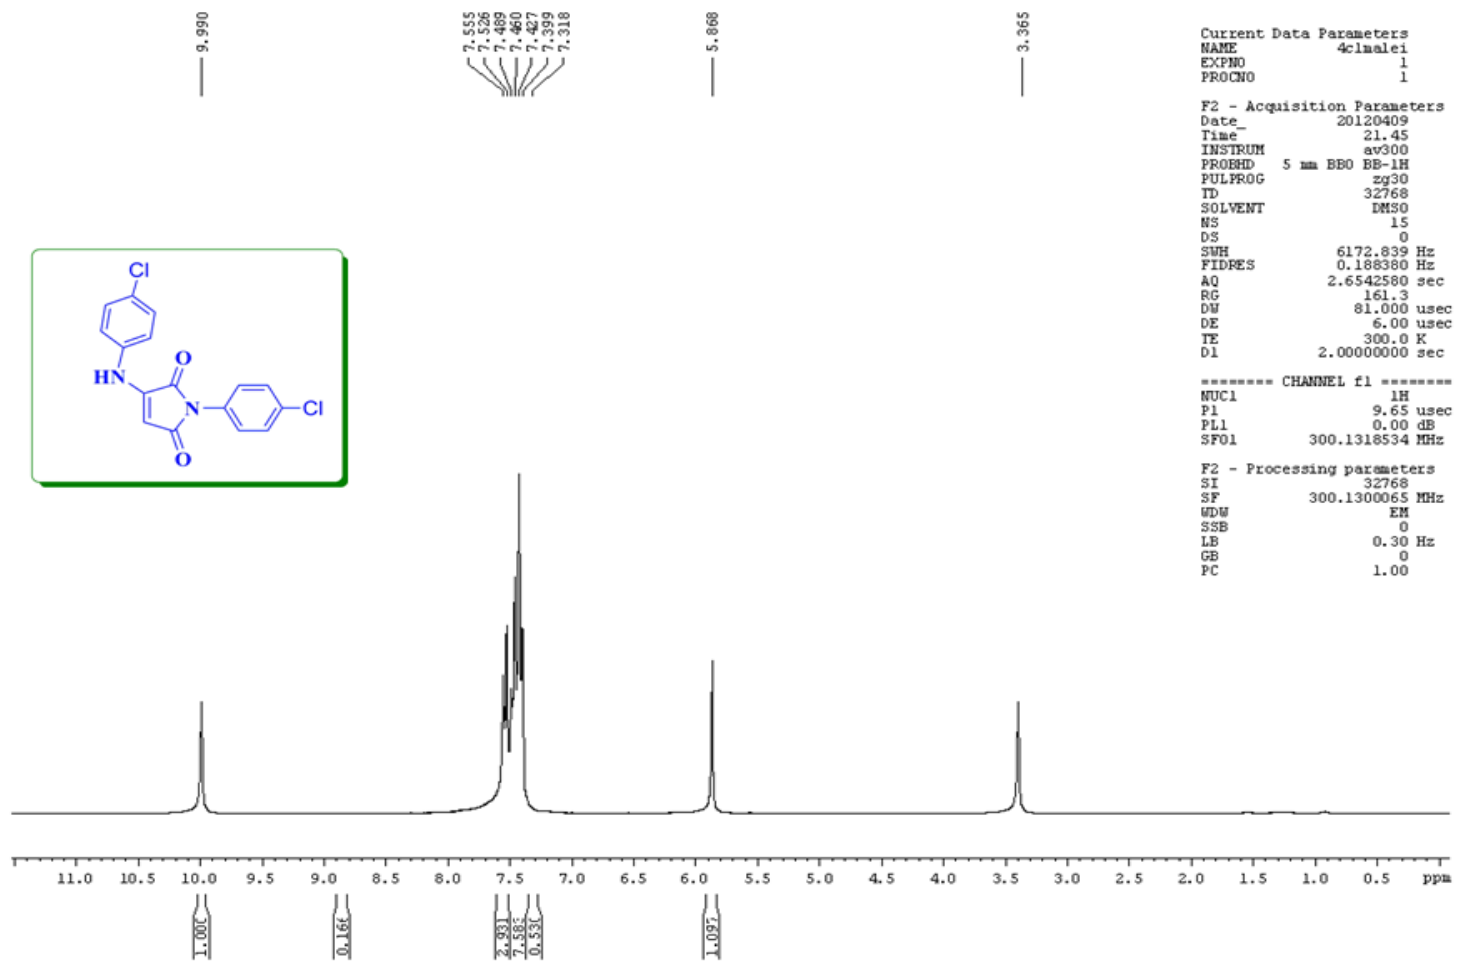

FIG 9:  $^1\text{H}$  NMR spectrum of **3c**

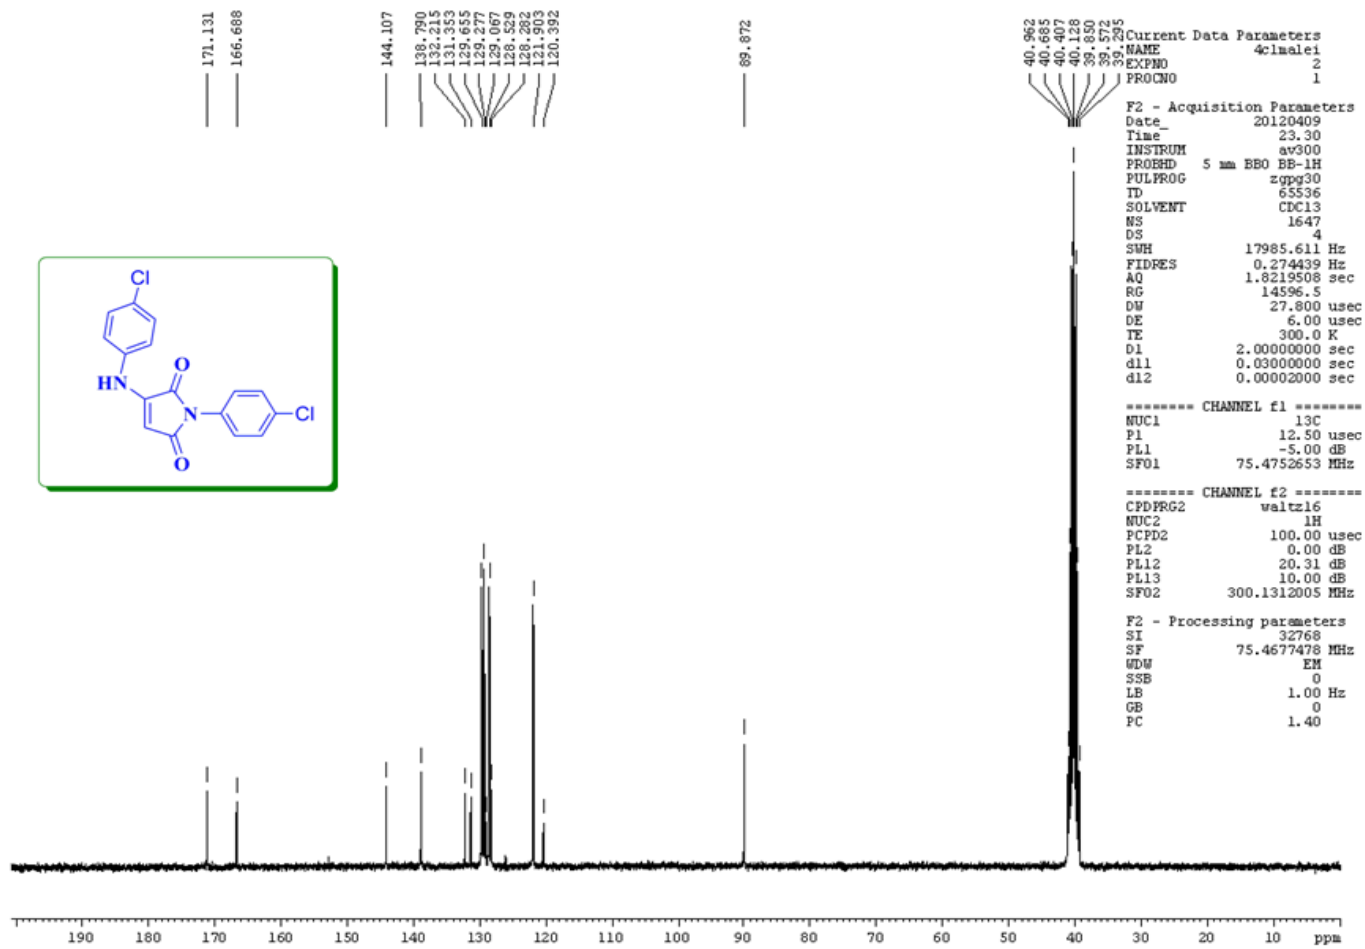

FIG 10: <sup>13</sup>C NMR spectrum of 3c

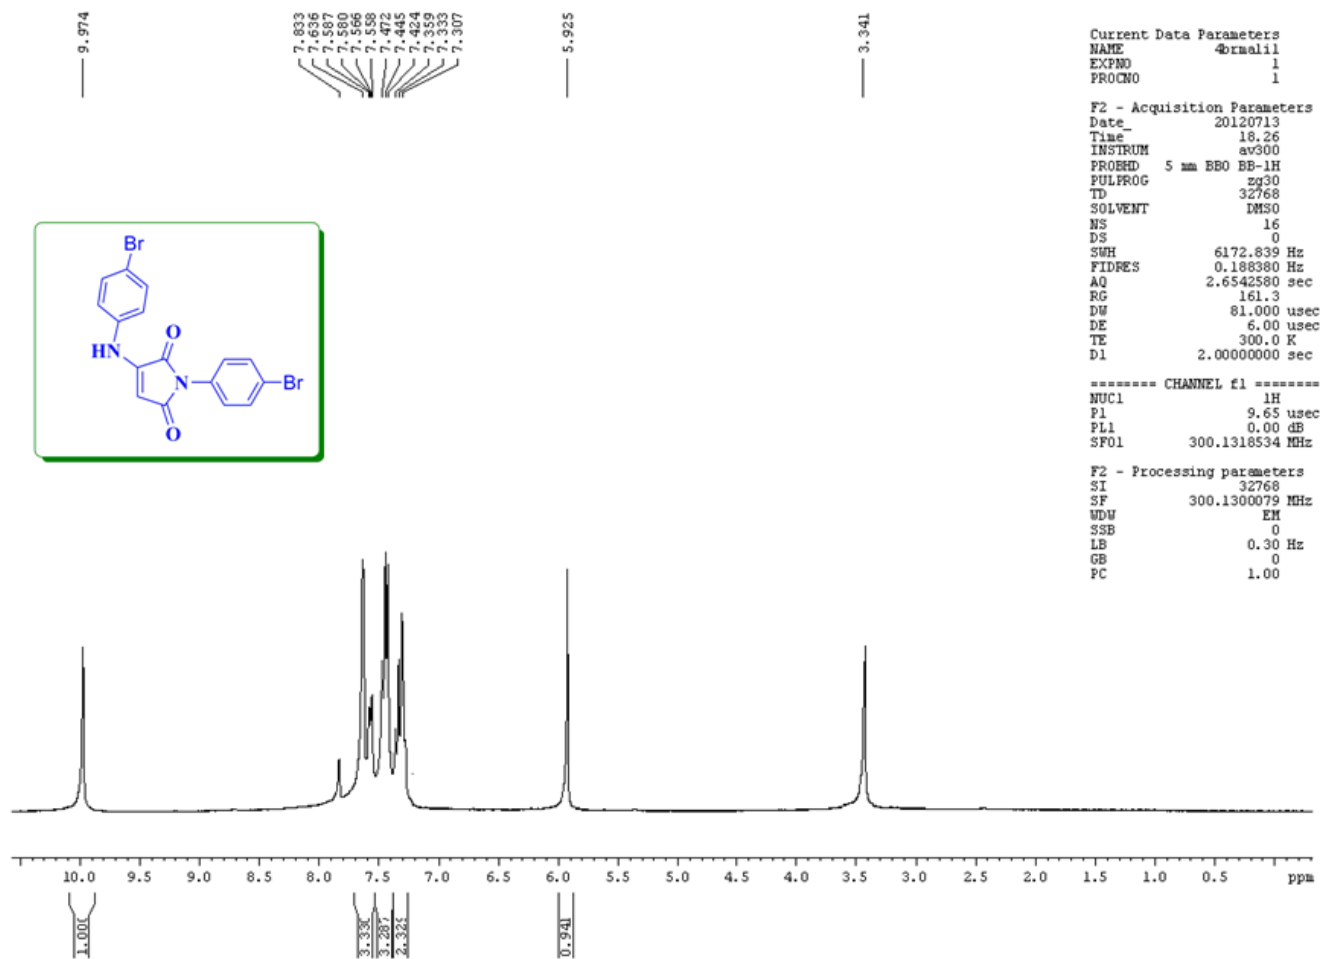

FIG 11: <sup>1</sup>H NMR spectrum of **3d**

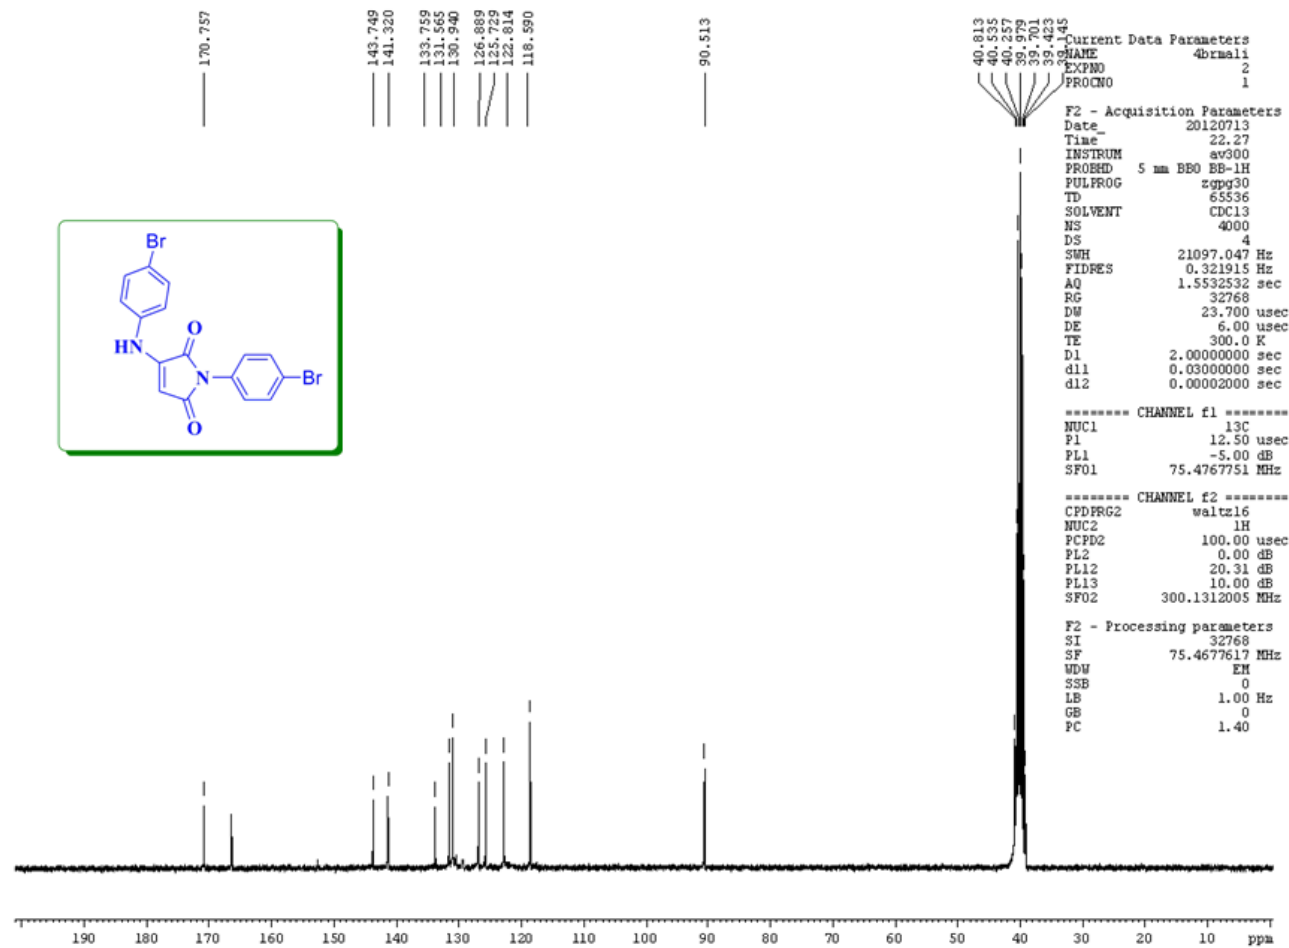

FIG 12:  $^{13}\text{C}$  NMR spectrum of **3d**

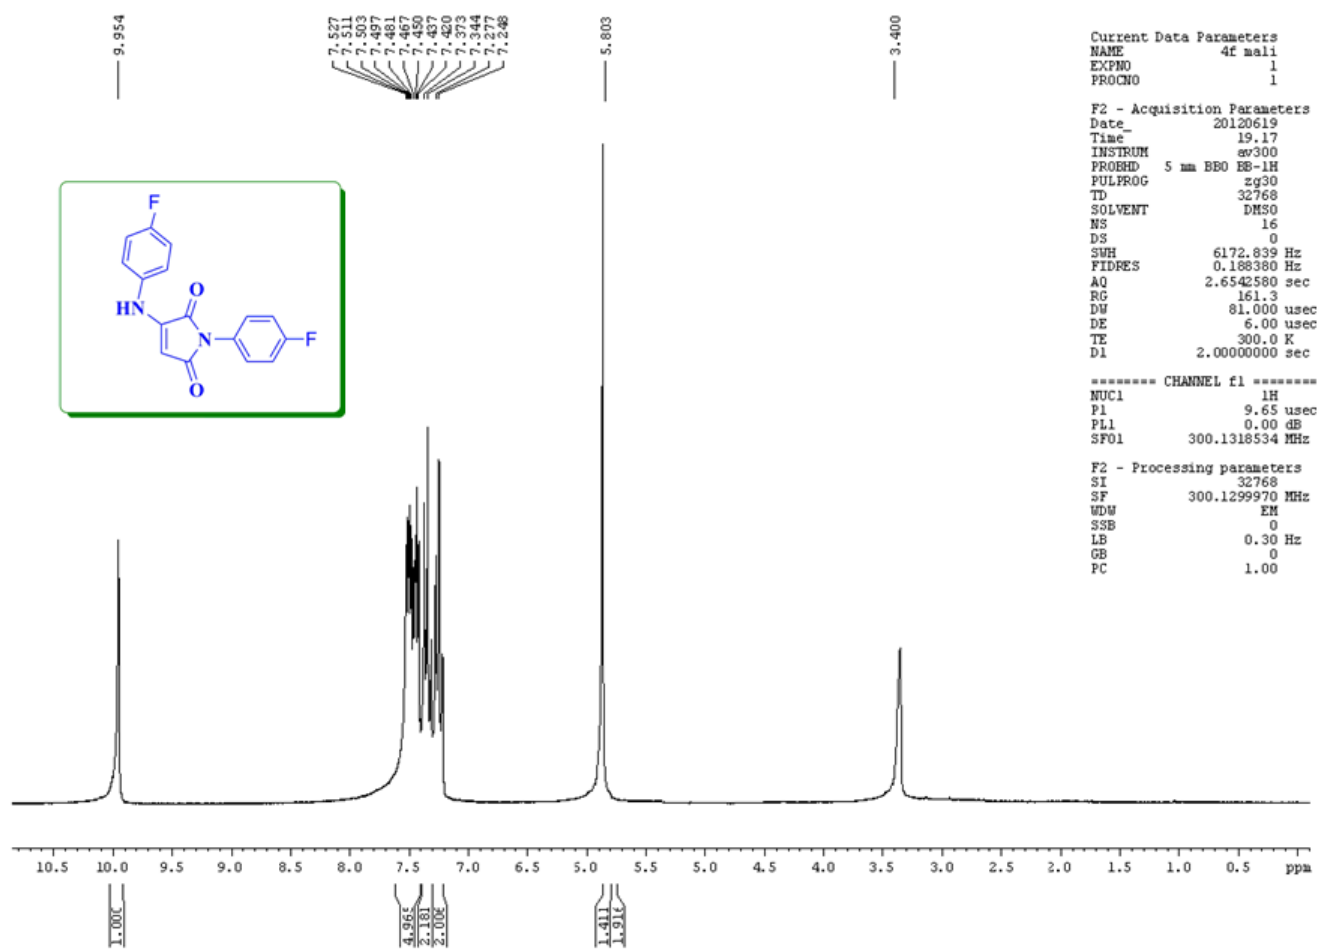

FIG 13:  $^1\text{H}$  NMR spectrum of **3e**

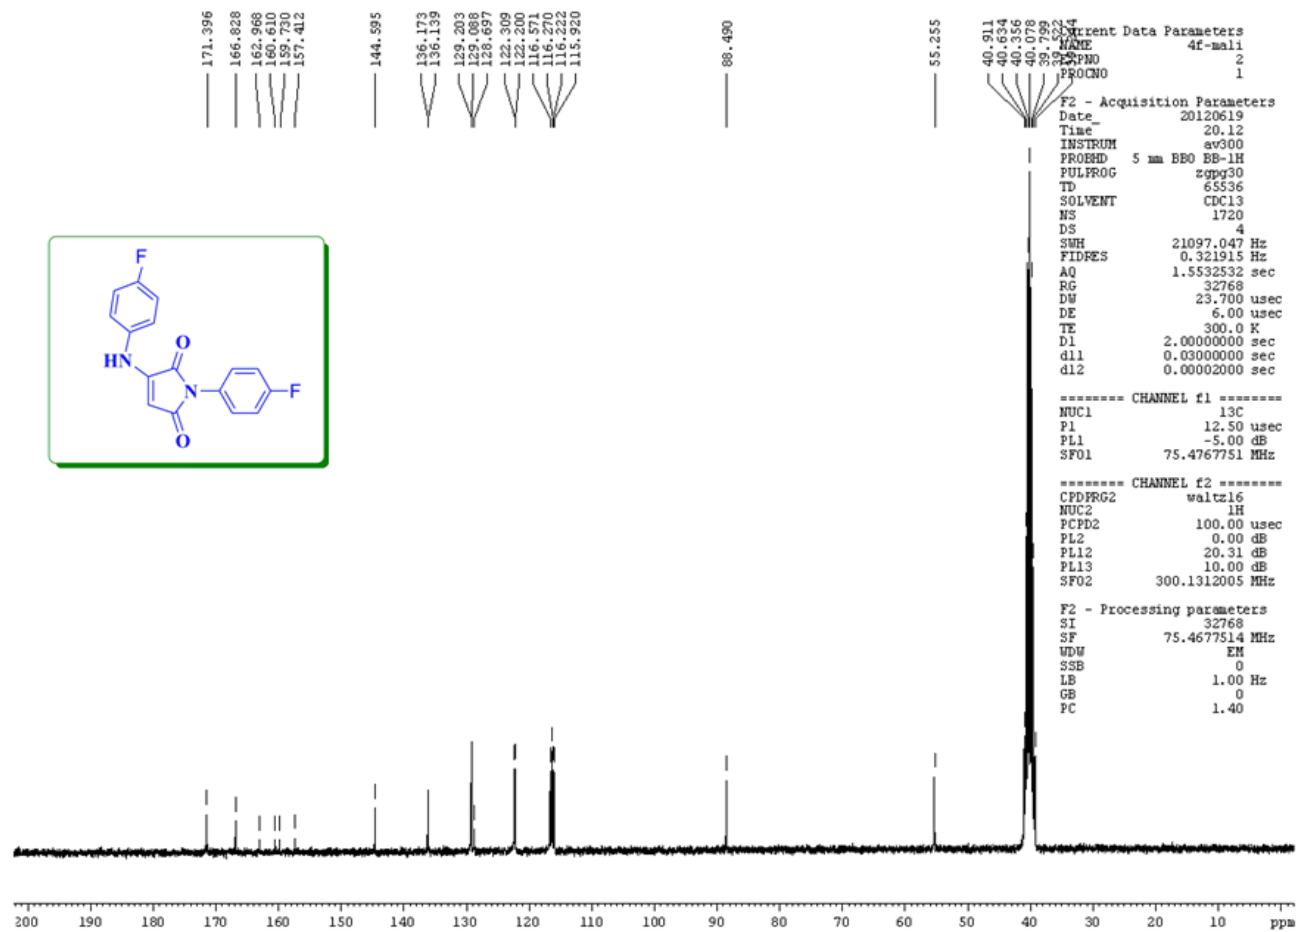

FIG 14:  $^{13}\text{C}$  NMR spectrum of **3e**



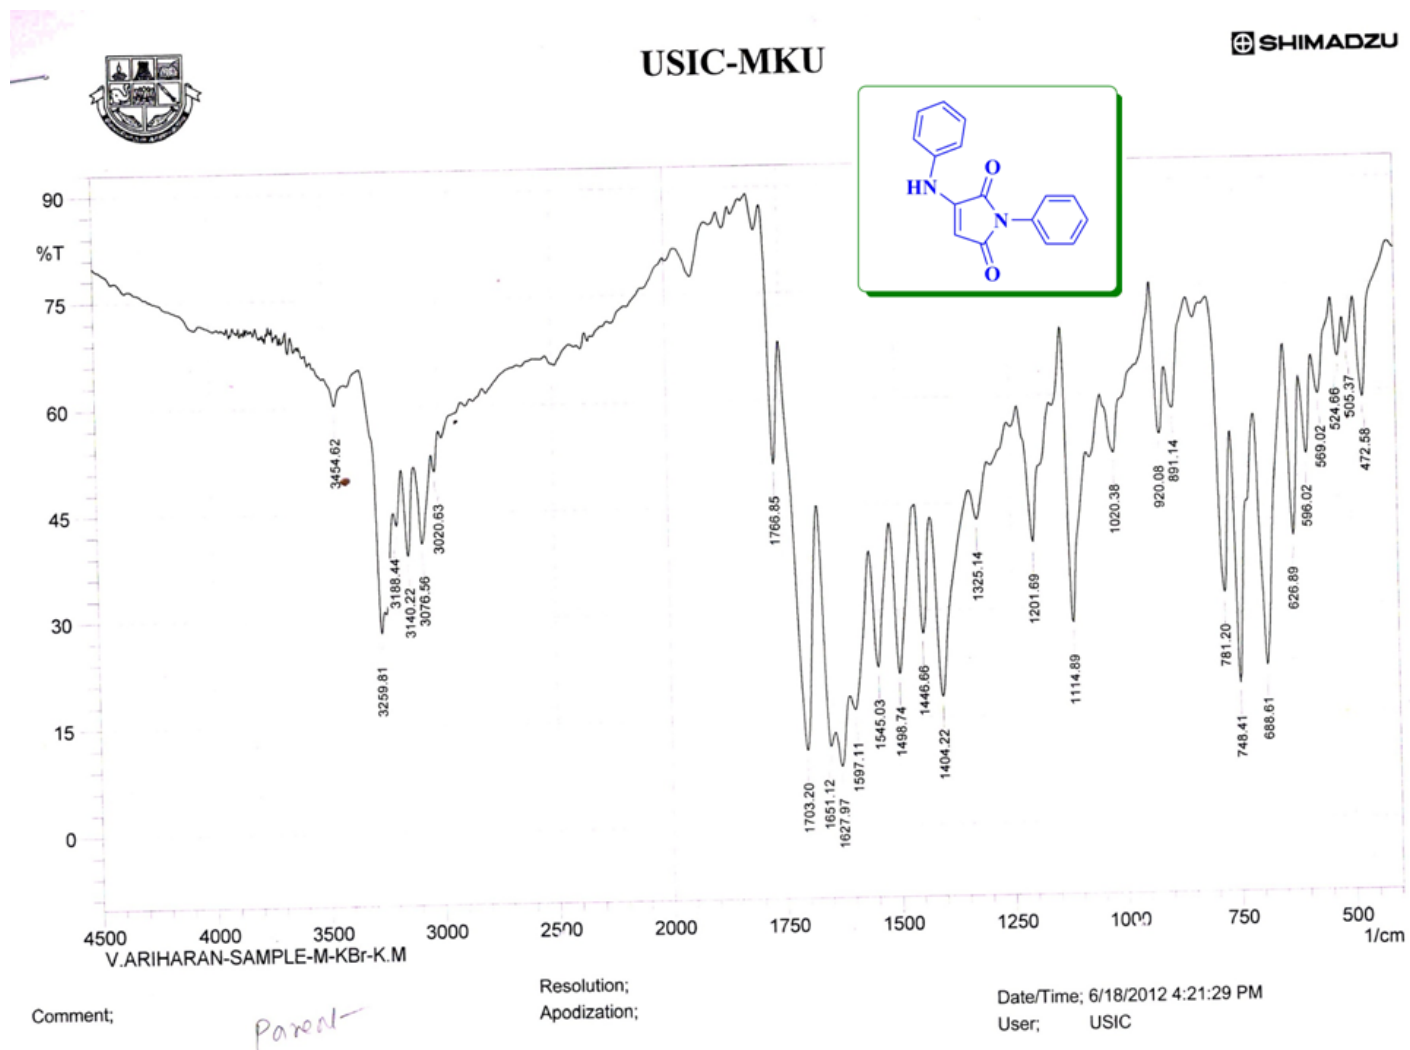

FIG 18: IR spectrum of **3a**

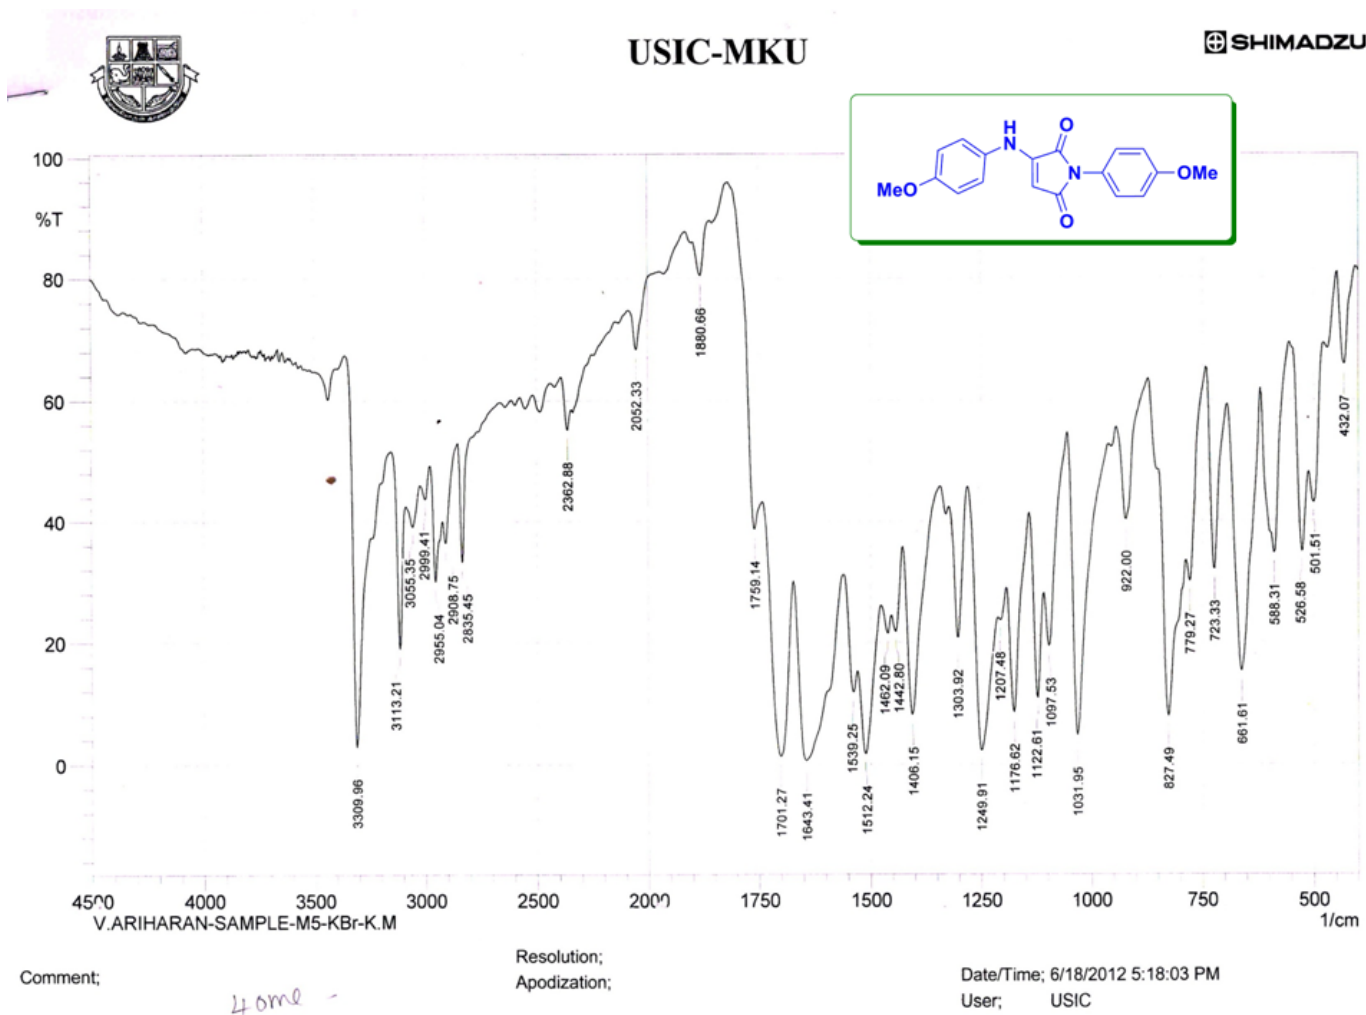

FIG 19: IR spectrum of **3b**

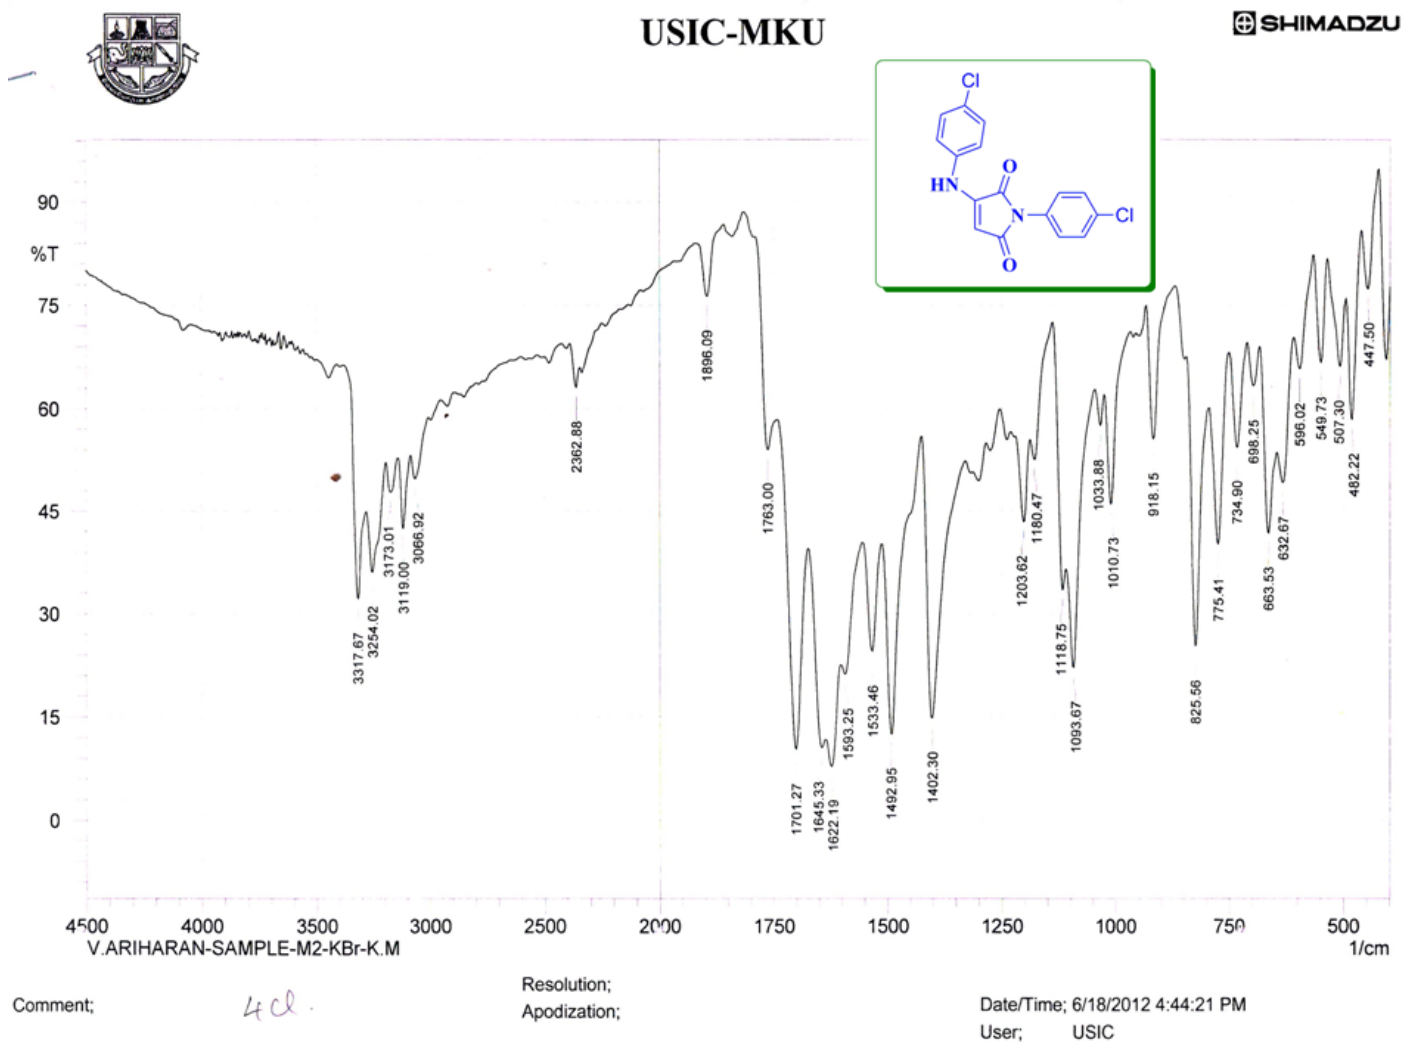

FIG 20: IR spectrum of **3c**

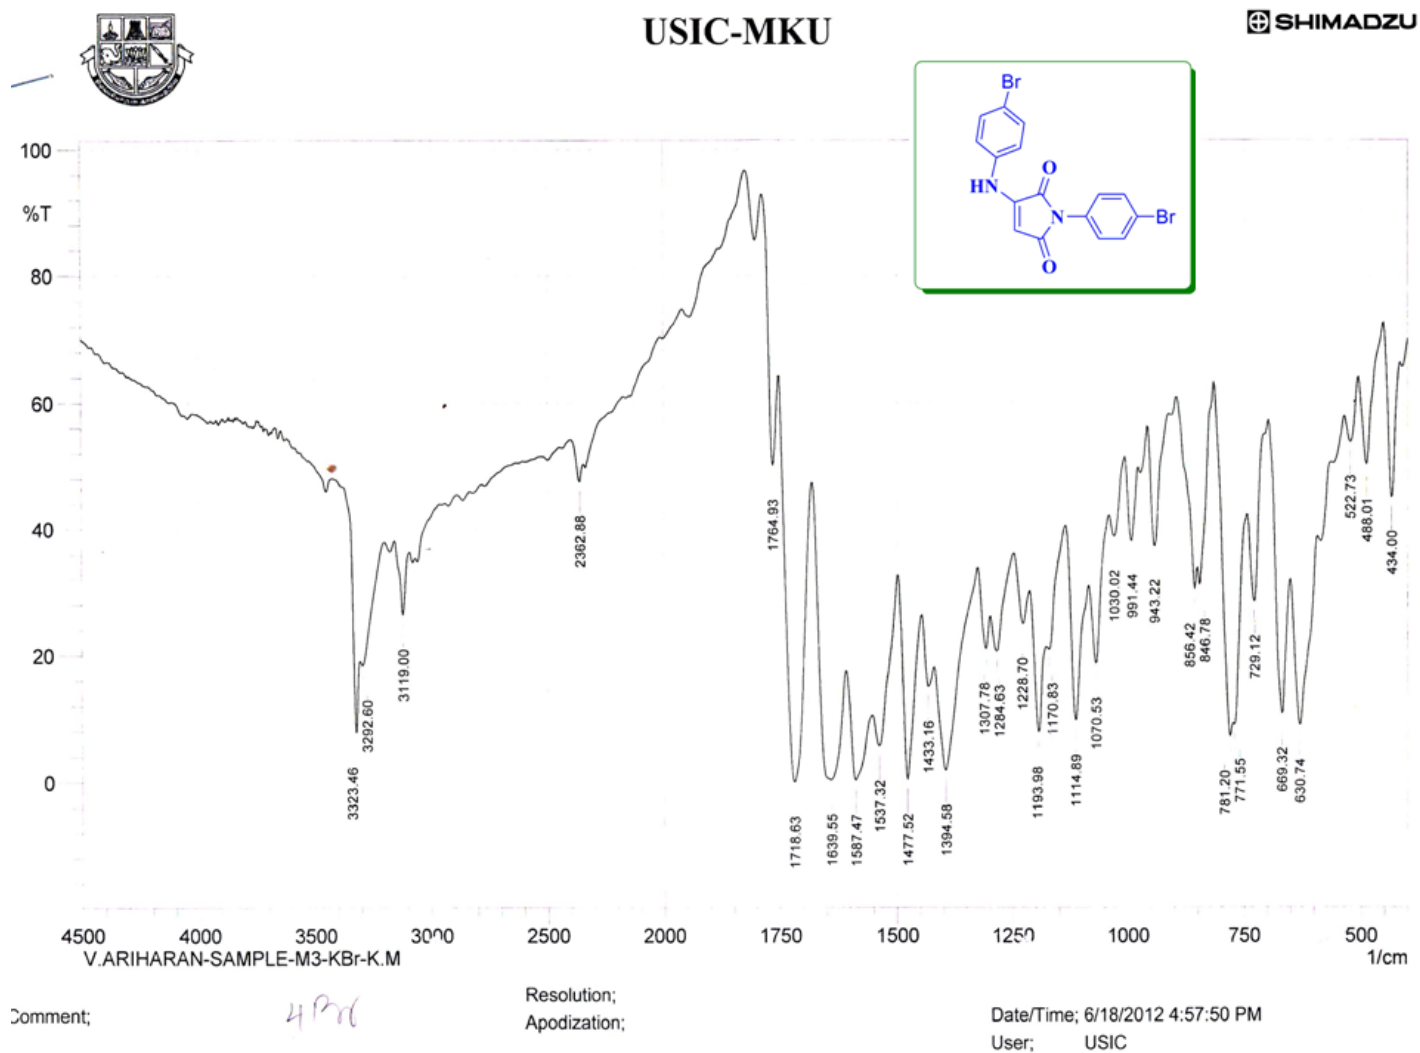

FIG 20: IR spectrum of **3d**

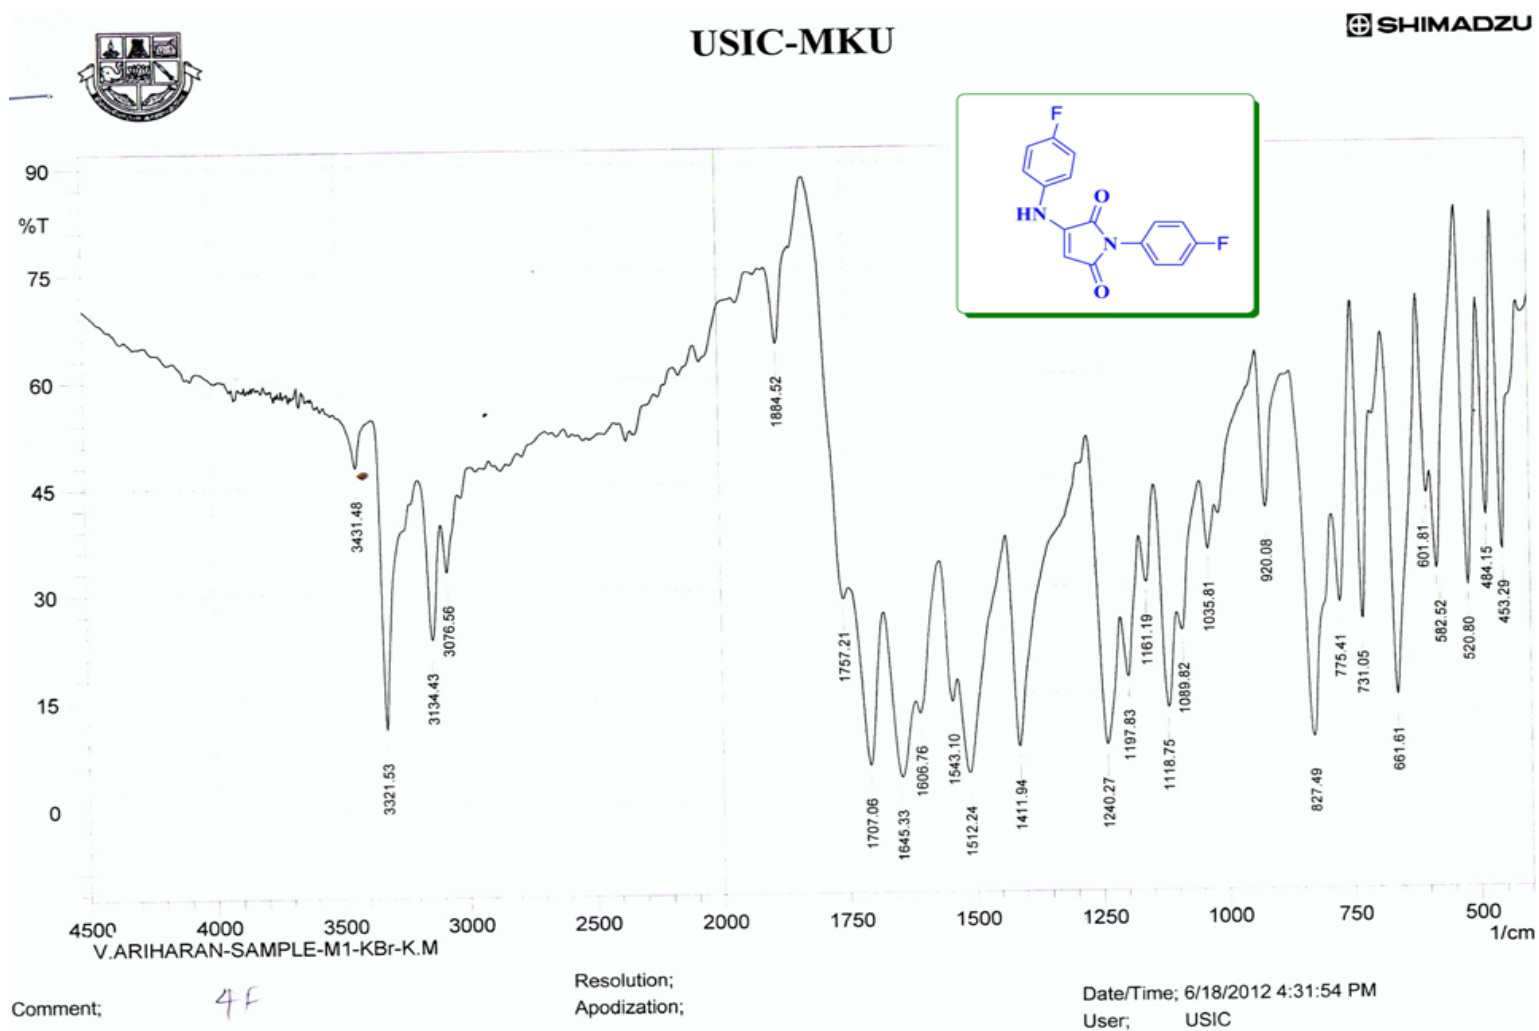

FIG 20: IR spectrum of 3e

### Selected Crystallographic Data for 3a

|                                   |                                                                                                             |
|-----------------------------------|-------------------------------------------------------------------------------------------------------------|
| Empirical formula                 | C <sub>16</sub> H <sub>12</sub> N <sub>2</sub> O <sub>2</sub>                                               |
| Formula weight                    | 264.28                                                                                                      |
| Temperature                       | 110(2) K                                                                                                    |
| Wavelength                        | 1.54178 Å                                                                                                   |
| Crystal system                    | Orthorhombic                                                                                                |
| Space group                       | P2(1)2(1)2(1)                                                                                               |
| Unit cell dimensions              | a = 7.3183(5) Å      alpha = 90°.<br>b = 12.5581(9) Å      beta = 90°.<br>c = 27.197(2) Å      gamma = 90°. |
| Volume                            | 2499.5(3) Å <sup>3</sup>                                                                                    |
| Z                                 | 8                                                                                                           |
| Density (calculated)              | 1.405 Mg/m <sup>3</sup>                                                                                     |
| Absorption coefficient            | 0.768 mm <sup>-1</sup>                                                                                      |
| F(000)                            | 1104                                                                                                        |
| Crystal size                      | 0.17 x 0.08 x 0.03 mm <sup>3</sup>                                                                          |
| Theta range for data collection   | 3.25 to 59.99°.                                                                                             |
| Index ranges                      | -8<=h<=8, -14<=k<=12, -30<=l<=30                                                                            |
| Reflections collected             | 16898                                                                                                       |
| Independent reflections           | 3613 [R(int) = 0.0557]                                                                                      |
| Completeness to theta = 59.99°    | 98.7 %                                                                                                      |
| Absorption correction             | Semi-empirical from equivalents                                                                             |
| Max. and min. transmission        | 0.9773 and 0.8805                                                                                           |
| Refinement method                 | Full-matrix least-squares on F <sup>2</sup>                                                                 |
| Data / restraints / parameters    | 3613 / 0 / 361                                                                                              |
| Goodness-of-fit on F <sup>2</sup> | 1.051                                                                                                       |
| Final R indices [I>2sigma(I)]     | R1 = 0.0538, wR2 = 0.1386                                                                                   |
| R indices (all data)              | R1 = 0.0663, wR2 = 0.1456                                                                                   |
| Absolute structure parameter      | 0.7(5)                                                                                                      |
| Largest diff. peak and hole       | 0.354 and -0.356 e.Å <sup>-3</sup>                                                                          |
